# Supplementary material for: Natural Products and Derivatives as Potential Zika virus Inhibitors: A Comprehensive Review
Source: MDPI journal article supplement (doi:10.3390/v15051211), 2023-05-20
Supplement: s1 [file s1]

## SUPPLEMENTARY MATERIAL

# Natural Products and Derivatives as Potential *Zika Virus* Inhibitors: A Comprehensive Review

Rosângela Santos Pereira <sup>1</sup>, Françoise Camila Pereira Santos <sup>1</sup>, Priscilla Rodrigues Valadares Campana <sup>1</sup>, Vivian Vasconcelos Costa <sup>2</sup>, Rodrigo Maia de Pádua <sup>1</sup>, Daniele da Glória de Souza <sup>3</sup>, Mauro Martins Teixeira <sup>2</sup> and Fernão Castro Braga <sup>1,\*</sup>

<sup>1</sup> Department of Pharmaceutical Products, Faculty of Pharmacy, Universidade Federal de Minas Gerais, Belo Horizonte 31270-901, MG, Brazil; rosa.rspereira@gmail.com (R.S.P.)

<sup>2</sup> Department of Biochemistry and Immunology, Institute of Biological Sciences, Universidade Federal de Minas Gerais, Belo Horizonte 31270-901, MG, Brazil

<sup>3</sup> Department of Microbiology, Institute of Biological Sciences, Universidade Federal de Minas Gerais, Belo Horizonte 31270-901, MG, Brazil

\* Correspondence: fernaobraga@farmacia.ufmg.br

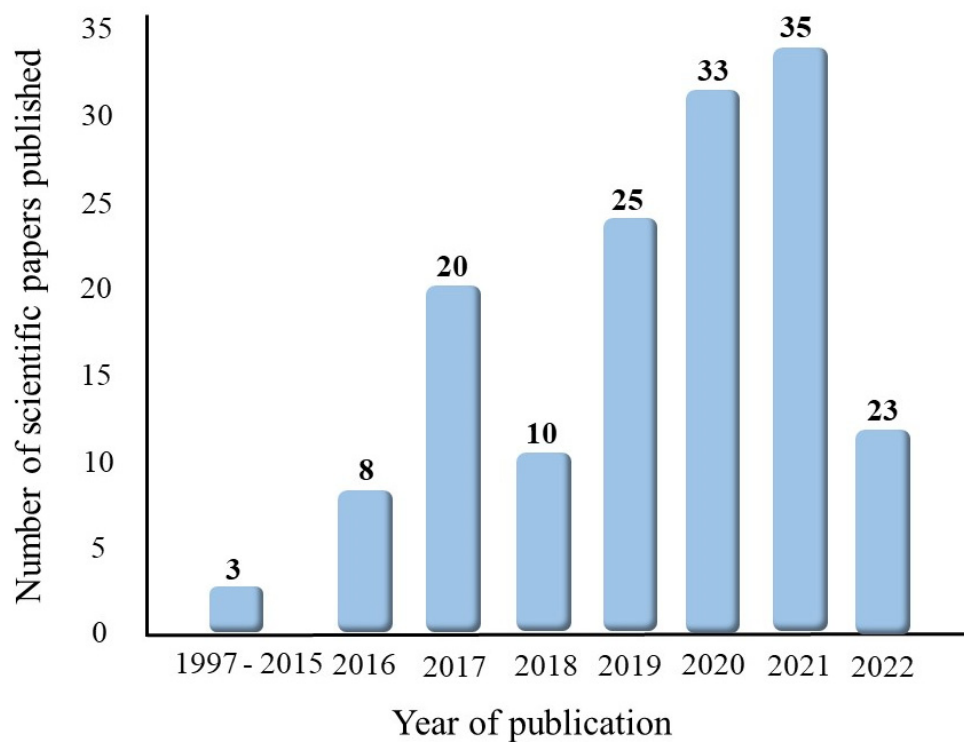

Figure S1: Number of scientific articles reporting natural products tested against ZIKV, published between January 1997 and December 2022. Total of 157 articles.

Table S1. Natural products that interact with molecular targets of ZIKV according to *in silico* data.

| <b><i>Zika virus</i><br/>molecular target</b> | <b>Natural products that interact with the target</b>                                                                                                                                                                                                                                                                                                                                                                                                                                              |
|-----------------------------------------------|----------------------------------------------------------------------------------------------------------------------------------------------------------------------------------------------------------------------------------------------------------------------------------------------------------------------------------------------------------------------------------------------------------------------------------------------------------------------------------------------------|
| MTase domain of NS5                           | Quercetagenin, Chrysophanic Acid, Jaceidin, Methylglovanon, Caninnot, Luteolin, Quercetin, Redentin, Anthranol, Heliannone B, Hydroxy Kemferol, Secterpathe and Beta Caryophyllene [34]                                                                                                                                                                                                                                                                                                            |
|                                               | Dihydroxy-348-trimethoxy, Isopomiferin, Silydianin B, Amyrisin C, Cannflavin, Derrisin, Mundinol, Schizolaeone B, Tomentodiplacone G, Silydianin, Diprenyleriodictyol, Isosilybin A, Silydin D, Taxifolin,, Silybin C, Silybin B, Silybin A, Lupiwighteone, Euchrenone B, Eryvarin Q, Eryvarin O, Abyssinone V, Sigmoidin C, Sigmoidin B, Robustone, Erycristagallin, (+)-Syringaresinol, Panthenolide, Papraline, Lycopene, Paprarine, Paprairie, Isoach, Fumaritine-N-oxide and Narlumirine [44] |
| RdRp domain of NS5                            | Ferulic Acid, 1-Aminocyclopropane-1-carboxylic acid, Cinnamic Acid, Bornylacetate, Salicylic Acid, Cymene, Gamma, Kolin, Fernesene, Myrtenal, Alphaprodine, Beta Pinene, Xylene, Benzaldehyde, Nicotinic Acid, Tridecanoic and Cyclopentadiene [34]                                                                                                                                                                                                                                                |
|                                               | Amyrisin A, Isopomiferin, Silydianin B, Isomangostin, Mearnsetin, Cannflavin, Derrisin, Mundinol, Schizolaeone B, Tomatidiplacone G, Anthraxin, Diprenyleriodictyol, Isosilybin B, Isosilybin A, Isoerysenegalenseine, Euchrenone B, Eryvarinols A, AbyssinoneV, Sigmoidin C, Sigmoidin B, Robustone, Oxyresveratrol, Osajin, Erycristagallin, Paprarine, Estafin, FumaritineN-oxide, Papracinine and Oxysanguinarine [44]                                                                         |
|                                               | Lycorine [63]                                                                                                                                                                                                                                                                                                                                                                                                                                                                                      |
|                                               | Xanthoangelol [46]                                                                                                                                                                                                                                                                                                                                                                                                                                                                                 |
|                                               | Polydatin, Dihydrogenistin, Liquiritin, Rhapontin and Cichoriin [48]                                                                                                                                                                                                                                                                                                                                                                                                                               |
| Envelope protein domain III                   | Bacopaside III and bacoside A [51]                                                                                                                                                                                                                                                                                                                                                                                                                                                                 |
|                                               | Epicatechin, baicalin, isonimolicinolide, madecassic acid, and apigenin-7- <i>O</i> -beta-D-glucopyranoside [39]                                                                                                                                                                                                                                                                                                                                                                                   |
|                                               | 4-Hydroxy-2-methylacetophenone, Stigmasterol, 6-Octen-1-ol,3,7-dimethyl, megastigmatrienone, myclohexylmethyl hexyl ester and testosterone cypionate [55]                                                                                                                                                                                                                                                                                                                                          |
|                                               | Palmatine [41]                                                                                                                                                                                                                                                                                                                                                                                                                                                                                     |
|                                               | Epigallocatechin gallate (EGCG) [53]                                                                                                                                                                                                                                                                                                                                                                                                                                                               |

|                           |                                                                                                                                                                                                                                                            |
|---------------------------|------------------------------------------------------------------------------------------------------------------------------------------------------------------------------------------------------------------------------------------------------------|
|                           | Tanic acid [52]                                                                                                                                                                                                                                            |
|                           | Harringtonine [42]                                                                                                                                                                                                                                         |
|                           | Chicoric acid, luteone, reserpine, and rosmarinic acid [60]                                                                                                                                                                                                |
|                           | Pentagalloylglucose, Parishin A and Stevioside [54]                                                                                                                                                                                                        |
|                           | Saikosaponin D; Cimicide F; Pomolic acid; Esculentoside A; Esculentoside B; Tinoside 5,7,2',5'-Tetrahydroxy-flavone; Andrographatoside; Cimicifugic acid B1; Cyanidin 3,5-diglucoside; Bruceine F; Delphinidin; Arnicolide D and Kirenol [56]              |
| Capsid protein            | Chicoric acid, luteone, reserpine, and rosmarinic acid [60]                                                                                                                                                                                                |
| Protease                  | Saikosaponin D; Cimicide F; Methyl euscaphate; Ganoderic acid Y; Pomolic acid; Macrophylloside D; Mudanpioside E; -Chrysanthemin; 8-epi-Loganic acid; Cyanidin 3,5-diglucoside; Arnicolide D; Delphinidin; 6,7-Dehydroartemisinic acid and Cylindrene [56] |
| Polymerase                | Saikosaponin D; Cimicide F; Esculentoside A; Ganoderic acid Y; Methyl euscaphate; Macrophylloside D; Dihydrobrusatol 1; Tinoside; Andrographatoside; Cyanidin 3,5-diglucoside; Delphinidin; Bruceine F; Schizonepetoside A and Nigakilactone K [56]        |
| NS1 protein               | Flavonoid-rich fractions (F1 to F10) [60]                                                                                                                                                                                                                  |
|                           | Tangeretin [61]                                                                                                                                                                                                                                            |
| NS1 e NS3 protein         | Bacopaside III and bacoside A [51]                                                                                                                                                                                                                         |
| NS2B/NS3, serine protease | Hesperetin (HST) [35]                                                                                                                                                                                                                                      |
| Helicase                  | Saikosaponin D; Esculentoside A; Cimicide F; Esculentoside B; Pomolic acid; Benzoyloxypaeniflorin; Macrophylloside D; Chrysanthemin; Mudanpioside E; Tinoside; Cyanidin 3,5-diglucoside; Bruceine F; Delphinidin; Schizonepetoside A and Retinol [56]      |
| NS3 helicase protein      | Cassiarina D, 3'-O-metildiplacona, exiguaflavanona A e lactucopicrina [28]                                                                                                                                                                                 |
|                           | Baicalein, catechin, muricatetrocin, canthin, eleutheroside B, ellagic acid, epigallocatechin, tneoandrographolide, ponapensin, sangennon [39]                                                                                                             |
|                           | 5,3'-dihydroxy-3,6,7,8,4'-pentamethoxyflavone (5DP); 5-hydroxy-3,6,7,8,3',4'-hexamethoxyflavone (5HH); myricetin-3-O-rhamnoside (M3OR) [50]                                                                                                                |
|                           | Rutin, Nicotiflorin, Isoquercitrin, and Hyperoside [66]                                                                                                                                                                                                    |
| NS2B-NS3 protease         | Quecetin [32]                                                                                                                                                                                                                                              |
|                           | Flinderol A, flinderol B, angusticornin B, curaridine [28]                                                                                                                                                                                                 |
|                           | Bromocriptine [29]                                                                                                                                                                                                                                         |
|                           | Novobiocin [57]                                                                                                                                                                                                                                            |
|                           | Myricetin; Quercetin; Luteolin; Isorhamnetin; Apigenin, Curcumin [31]                                                                                                                                                                                      |

|                                  |                                                                                                                                                                                                                                                                                                           |
|----------------------------------|-----------------------------------------------------------------------------------------------------------------------------------------------------------------------------------------------------------------------------------------------------------------------------------------------------------|
|                                  | Hydroxychloroquine [30]                                                                                                                                                                                                                                                                                   |
|                                  | Narigenin [36]                                                                                                                                                                                                                                                                                            |
|                                  | Quercetin, rutin and pedalitin [38]                                                                                                                                                                                                                                                                       |
|                                  | Epigallocatechin gallate, epigallocatechin gallate-7- <i>O</i> -glucopyranoside, epigallocatechin gallate-4'- <i>O</i> - $\alpha$ -glucopyranoside, isoquercetin, rutin, sanggenon O [40]                                                                                                                 |
|                                  | Berberine derivatives (4a, 4b, 4c, 4d, 5a, 5b, 5c and 5d) [43]                                                                                                                                                                                                                                            |
|                                  | Glycyrrhetic acid derivatives 13 and 19 [62]                                                                                                                                                                                                                                                              |
|                                  | Bisandrographolide, Andrographolide, and Andrographiside [45]                                                                                                                                                                                                                                             |
|                                  | Chicoric acid, luteone, reserpine, and rosmarinic acid [60]                                                                                                                                                                                                                                               |
|                                  | $\beta$ -caryophyllene [49]                                                                                                                                                                                                                                                                               |
|                                  | Bixin, annatto, crocetin dimethyl ester, ethyl bixin, mycorradicin, norbixin and transcrocetin [47]                                                                                                                                                                                                       |
| NS5 methyltransferase            | Cimicifanol, cimicifemato B, ácido rosmarínico, kanzonol Y, curaridina, kanzonol V, solofenol D, (-)-asarina [28]                                                                                                                                                                                         |
|                                  | Glycyrrhizic acid derivatives conjugated with amino acid (Compound 13 e 14) [62]                                                                                                                                                                                                                          |
|                                  | Theaflavin [65]                                                                                                                                                                                                                                                                                           |
|                                  | Bixin, annatto, crocetin dimethyl ester, ethyl bixin, mycorradicin, norbixin and transcrocetin [47]                                                                                                                                                                                                       |
| NS5 protein                      | Baicalein and baicalin [37]                                                                                                                                                                                                                                                                               |
|                                  | $\beta$ -caryophyllene [49]                                                                                                                                                                                                                                                                               |
|                                  | Tangeretin [61]                                                                                                                                                                                                                                                                                           |
| NS5 RNA-dependent RNA polymerase | 4',7-Digalloylecatechin-di- <i>O</i> -dimethylisoguaiacin, 2,4,4'-trihydroxy-3,3'-diprenylchalcone, flinderol B [28]                                                                                                                                                                                      |
|                                  | Piperine and Isoscutellarein [64]                                                                                                                                                                                                                                                                         |
|                                  | Chicoric acid, luteone, reserpine, and rosmarinic acid [60]                                                                                                                                                                                                                                               |
|                                  | Rutin, Nicotiflorin, Isoquercitrin, and Hyperoside [66]                                                                                                                                                                                                                                                   |
| Methyltransferase                | Sinefungin [58]                                                                                                                                                                                                                                                                                           |
|                                  | Saikosaponin D; Esculentoside B; Ganoderic acid Y; Methyl euscaphate; Cimicifanol F; Benzoyloxypaeniflorin; Chrysanthemin; Cimicifugic acid B1; Macrophyllolide D; 5,7,2',5'-Tetrahydroxy-flavone; Mudanpioside E; Cyanidin 3,5-diglucoside; Retinol; Bruceine F; Delphinidin and Schizonepetoside A [56] |
| TNF                              | Curcumin [33]                                                                                                                                                                                                                                                                                             |

Table S2. Anti-ZIKV activity induced by natural products and derivatives, assayed by *in vitro* methods, that showed selectivity index (SI)  $\leq 10$ .

| Source                                                      | Sample                                                                                                | Anti-ZIKV activity                                    |                                                                                                                                                                                                                    | Reference |
|-------------------------------------------------------------|-------------------------------------------------------------------------------------------------------|-------------------------------------------------------|--------------------------------------------------------------------------------------------------------------------------------------------------------------------------------------------------------------------|-----------|
|                                                             |                                                                                                       | Cell lineage or Assay model                           | SI / Biological effect                                                                                                                                                                                             |           |
| Derivatives of quinine                                      | chloroquine                                                                                           | hBMECs cells                                          | SI = 8.21                                                                                                                                                                                                          | [90]      |
| Derivatives of quinine                                      | chloroquine                                                                                           | neural stem cells                                     | SI = 7.68                                                                                                                                                                                                          | [90]      |
| Bacterium <i>Streptomyces narbonensis</i>                   | lovastatin                                                                                            | Huh7 cells                                            | SI > 2.5                                                                                                                                                                                                           | [173]     |
| Fungus <i>Aspergillus terreus</i>                           | kitasamycin,                                                                                          | Huh7 cells                                            | SI = > 1.2                                                                                                                                                                                                         | [173]     |
| -                                                           | (+)- <i>trans</i> -dihydronarciclasine SC, narciclasine SC and pancratistatin SC                      | Vero C-1008 cells                                     | SI = 7; 4 and 4 respectively                                                                                                                                                                                       | [174]     |
| -                                                           | Bromocriptine PC                                                                                      | ZIKV NS2B-NS3 protease inhibition assay<br>Vero cells | IC <sub>50</sub> = 21.6±1.1µM<br>SI > 3.07<br>Interferes with the steps after the internalization of the ZIKV                                                                                                      | [29]      |
| Leaves (L) and Branches (B)<br>( <i>Tontelea micranta</i> ) | Hexane EX (L), ethyl acetate (L), methanolic (L), hexane EX (B), chloroform (B) and ethyl acetate (B) | Vero cells                                            | SI = 2.66; 3.03; 4.23; 4.70; 9.60 and 2.85<br>Virucidal effect, strongly acting on the viral particle, and inhibited the infection at the adsorption and penetration stages, except for the hexane branch extract. | [175]     |
| <i>Tecoma castaneifolia</i><br>Trunks and leaves            | Ethanolic, EX                                                                                         | Vero cells                                            | SI = 1.53<br>SI > 3.27                                                                                                                                                                                             | [176]     |
| <i>Tecoma garrocha</i><br>Trunks and leaves                 | Ethanolic, EX                                                                                         | Vero cells                                            | SI = 1.21<br>SI > 1.33                                                                                                                                                                                             | [176]     |
| <i>Tecoma stans</i> var. <i>stans</i><br>Leaves             | Ethanolic, EX                                                                                         | Vero cells                                            | SI > 2.03                                                                                                                                                                                                          | [176]     |
| <i>Tecoma stans</i> var. <i>angustata</i>                   | Ethanolic, EX                                                                                         | Vero cells                                            | SI > 3.73                                                                                                                                                                                                          | [176]     |

|                                                                                                                                                                                                                                                                                                  |                                                                                                                                                                                                                                                                                                                                         |                                          |                                                                                                                                                                                                                                                                 |       |
|--------------------------------------------------------------------------------------------------------------------------------------------------------------------------------------------------------------------------------------------------------------------------------------------------|-----------------------------------------------------------------------------------------------------------------------------------------------------------------------------------------------------------------------------------------------------------------------------------------------------------------------------------------|------------------------------------------|-----------------------------------------------------------------------------------------------------------------------------------------------------------------------------------------------------------------------------------------------------------------|-------|
| Leaves                                                                                                                                                                                                                                                                                           |                                                                                                                                                                                                                                                                                                                                         |                                          |                                                                                                                                                                                                                                                                 |       |
| <i>Tecoma stans</i> var. <i>stans</i><br>Trunks                                                                                                                                                                                                                                                  | Ethyl acetate EX,<br>FR;<br>Aqueous FR<br>and<br>Crenatoside IC                                                                                                                                                                                                                                                                         | Vero cells                               | SI = 1.33;<br>SI = 2,53 and<br>SI = 4,25                                                                                                                                                                                                                        | [176] |
| <i>Cissus erosa</i> Stems and<br>leaves                                                                                                                                                                                                                                                          | Stems ethanolic<br>EX and<br>Leaves ethanolic<br>EX                                                                                                                                                                                                                                                                                     | Vero cells                               | SI = 8.5 and 3.7<br>respectively                                                                                                                                                                                                                                | [177] |
| <i>Ehretia microphylla</i> ;<br><i>Combretum indicum</i> ;<br><i>Psidium guajava</i> ;<br><i>Clinopodium douglasii</i> ;<br><i>Blumea balsamifera</i> ;<br><i>Peperomia pelúcida</i> ;<br><i>Vitex negundo</i> ;<br><i>Momordica charantia</i> ;<br><i>Senna alata</i> and <i>Allium sativum</i> | Aqueous EX                                                                                                                                                                                                                                                                                                                              | Vero cells                               | SI = 1.2548; 1.0752;<br>2.1905; 1.0792; 1.6972;<br>0.2000; 1.8290; 2.2739;<br>1.0933 and 1.4160<br>respectively<br>The authors suggest that<br>the mechanism of viral<br>inhibition is more likely to<br>be via binding with ZIKV<br>viral replication proteins | [56]  |
| Derivatives of flavanone<br>naringenin                                                                                                                                                                                                                                                           | 7-(hexyloxy)-5-<br>hydroxy-2-(4-<br>hydroxyphenyl)ch<br>roman-4-one;<br>5-hydroxy-2-(4-<br>hydroxyphenyl)-<br>7-<br>(octyloxy)chroma<br>n-4-one;<br>5-hydroxy-2-(4-<br>hydroxyphenyl)-<br>7-<br>(nonyloxy)chrom<br>an-4-one and<br>7-(dodecyloxy)-5-<br>hydroxy-2-(4-<br>hydroxyphenyl)ch<br>roman-4-one<br><br>All compounds are<br>SC | Table S2. <i>Cont.</i><br><br>A549 cells | SI = 4.39; 4.12; 4.11 and<br>4.2 respectively                                                                                                                                                                                                                   | [178] |
| <i>Isodon xerophilus</i><br>Aerial parts                                                                                                                                                                                                                                                         | Enanderinanin J<br>IC                                                                                                                                                                                                                                                                                                                   | A549 cells                               | SI = 5.6<br>The autophagy inhibitory<br>activity of enanderinanin J<br>protects host cells from<br>these RNA viruses.                                                                                                                                           | [179] |
| <i>Ouratea semiserrata</i><br>Stems                                                                                                                                                                                                                                                              | Ethanolic EX,<br>epicatechin PC ,                                                                                                                                                                                                                                                                                                       | Vero cells                               | SI = 1.30, >3.55, > 10.00<br>and 4.00 respectively                                                                                                                                                                                                              | [180] |

|                                                        |                                                                                                                  |                                      |                                                                                   |       |
|--------------------------------------------------------|------------------------------------------------------------------------------------------------------------------|--------------------------------------|-----------------------------------------------------------------------------------|-------|
|                                                        | catechin PC and rutin PC                                                                                         |                                      |                                                                                   |       |
| <i>Bruguiera gymnorhiza</i><br>Fruits and roots        | Aqueous EX by maceration                                                                                         | A549 cells                           | SI = 3.0 and 3.3 respectively<br>Inhibited the infection at the adsorption stage. | [181] |
| -                                                      | Berberine derivatives (4a, 4b, 4c, 5a,5b,5c and 5d)                                                              | Vero cells                           | SI = 4.1, 3.2, 4.7, 7.5, 2.4, 2.6, 2.8 and 2.7 respectively                       | [43]  |
| -                                                      | Lycorine;<br>Pretazettine;<br>Narciclasine;<br>Narciclasine-4-O- $\beta$ -D-xylopyranoside and 1-acetyl-lycorine | Vero cells<br>Table S2. <i>Cont.</i> | SI = 3.8; 3.8; 6.0; 6.5 and 1.0 respectively                                      | [182] |
| <i>Angelica keiskei</i>                                | Xanthoangelol-E                                                                                                  | Vero cells                           | SI = 5                                                                            | [46]  |
| <i>M. ilicifolia</i> and <i>T. phaeocarpa</i>          | -                                                                                                                | SH-SY5Y cells                        | SI=3.4 and SI=4.8 respectively                                                    | [83]  |
| <i>Artemisia capilaris</i> and <i>Hedyotis diffusa</i> | Aqueous EX                                                                                                       | Vero cells                           | SI=5.2 and SI=4.9 respectively                                                    | [85]  |
| -                                                      | Pedalitin and quercetin                                                                                          | Vero cells                           | SI=4.3 and SI=2.0 respectively                                                    | [123] |

EC= extract; IC= isolated compound; FR = fraction; CC = Cytotoxic concentration; IC = Inhibitory concentration; EC= effective concentration; SI = selectivity index; PC = purchased compound; SC = synthesized compound; nd = not determined. Vero = kidney epithelial cells of African green monkey; A549 = Human epithelial cells; hBMECs = human brain microvascular endothelial cells

## References (not cited in the manuscript)

173. Pascoalino, B.S.; Courtemanche, G.; Cordeiro, M.T.; Gil, L.H.; Freitas-Junior, L. Zika antiviral chemotherapy: identification of drugs and promising starting points for drug discovery from an FDA-approved library. *F1000Res.* **2016**, *5*, 2523. doi: 10.12688/f1000research.9648.1
174. Revu, O.; Zepeda-Velázquez, C.; Nielsen, A.J.; McNulty, J.; Yolken, R.H.; Jones-Brando, L. Total synthesis of the natural product (+)-*trans*-Dihydronarciclasine via an asymmetric organocatalytic [3+3]-cycloaddition and discovery of its potent anti-Zika virus (ZIKV) activity. *ChemistrySelect* **2016**, *1*, 5895-5899. doi: 10.1002/slct.201601536
175. Ferreira, F.L.; Hauck, M.S.; Duarte, L.P.; Magalhães, J.C.; Silva, L.S.M.; Pimenta, L.P.S.; Lopes, J.C.D.; Mercadante-Simões, M.O.; Vieira Filho, S.A. Zika virus activity of the leaf and branch extracts of *Tontelea micrantha* and its hexane extracts phytochemical study. *J. Braz. Chem. Soc.* **2019**, *30*, 793-803. doi: 10.21577/0103-5053.20180210



176. Reis, A.C.C.; Silva, B.M.; de Moura, H.M.M.; Pereira, G.R.; Brandão, G.C. Anti-*Zika virus* activity and chemical characterization by ultra-high performance liquid chromatography (UPLC-DAD-UV-MS) of ethanol extracts in *Tecoma* species. *BMC Complement. Med. Ther.* **2020**, *20*, 246. doi: 10.1186/s12906-020-03040-0
177. Reis, A.C.C.; Moura, H.M.M.; Silva, B.M.; Oliveira, A.B.; Brandão, G.C. Antiviral activity and chemical characterization of *Cissus erosa* (Vitaceae) ethanol extracts. *Rodriguésia* **2020b**, *71*. doi: <https://doi.org/10.1590/2175-7860202071052>
178. Mendes, L.A.O.; Ponciano, C.S.; Depieri Cataneo, A.H.; Wowk, P.F.; Bordignon, J.; Silva, H.; Vieira de Almeida, M.; Ávila, E.P. The anti-*Zika virus* and anti-tumoral activity of the citrus flavanone lipophilic naringenin-based compounds. *Chem Biol Interact.* **2020**, *331*, 109218. doi: 10.1016/j.cbi.2020.109218
179. Huang, L.; Fu, Q.; Dai, J.M.; Yan, B.C.; Wang, D.; Puno, P.T.; Yue, J. High-content screening of diterpenoids from *Isodon* species as autophagy modulators and the functional study of their antiviral activities. *Cell Biol. Toxicol.* **2021**, *37*, 695-713. doi: 10.1007/s10565-021-09580-6
180. Ferreira, G.M.; de Mello Silva, B.; de Souza, G.H.B.; de Oliveira, A.B.; Brandão, G.C. Anti-*Zika* activity of *Ouratea semiserrata* and dereplication of its constituents. *Rev. Bras. Farmacogn.* **2021**, *31*, 121-125. doi: 10.1007/s43450-021-00129-6
181. Bibi Sadeer, N.; Haddad, J.G.; Oday Ezzat, M.; Desprès, P.; Abdallah, H.H.; Zengin, G.; Uysal, A.; El Kalamouni, C.; Gallo, M.; Montesano, D.; Mahomoodally, M.F. *Bruguiera gymnorhiza* (L.) Lam. at the forefront of pharma to confront *Zika virus* and microbial infections-an *in vitro* and *in silico* perspective. *Molecules* **2021**, *26*, 5768. doi: 10.3390/molecules26195768
182. de Castro Barbosa, E.; Alves, T.M.A.; Kohlhoff, M.; Jangola, S.T.G.; Pires, D.E.V.; Figueiredo, A.C.C.; Alves, É.A.R.; Calzavara-Silva, C.E.; Sobral, M.; Kroon, E.G.; Rosa, L.H.; Zani, C.L.; de Oliveira, J.G. Searching for plant-derived antivirals against *Dengue virus* and *Zika virus*. *Virol. J.* **2022**, *19*, 31. doi: 10.1186/s12985-022-01751-z
